1        **Temperature-dependent use of daily torpor attenuates the**  
2        **energetic consequences of habitat selection for a widespread**  
3        **bat**

4  
5  
6  
7        Jesse M. Alston <sup>\* a,b,c</sup>, Michael E. Dillon <sup>a,b</sup>, Douglas A. Keinath <sup>d</sup>, Ian M.  
8        Abernethy <sup>c</sup>, and Jacob R. Goheen <sup>a,b</sup>

9        <sup>a</sup> Program in Ecology, University of Wyoming, Laramie, WY, USA

10       <sup>b</sup> Department of Zoology and Physiology, University of Wyoming, Laramie, WY,  
11        USA

12       <sup>c</sup> Wyoming Natural Diversity Database, University of Wyoming, Laramie, WY, USA

13       <sup>d</sup> Wyoming Ecological Services Field Office, United States Fish and Wildlife Service,  
14        Cheyenne, WY, USA

15        \* Corresponding author: [jalston@uwyo.edu](mailto:jalston@uwyo.edu)

16  
17  
18  
19        **Summary**

20        1. Many animals employ heterothermy to conserve energy during periods of  
21        inactivity, stress, or low resource availability. Unlike homeotherms, these  
22        heterotherms have some flexibility in body temperature. Unlike poikilotherms,  
23        heterotherms can maintain body temperatures independently from their

24 environments. Heterotherms should thus exhibit fundamentally different  
25 responses to suboptimal environmental temperatures than either homeotherms  
26 or poikilotherms.

27 **2.** In a species of heterothermic bat (*Myotis thysanodes*), we studied how daily  
28 torpor and roost selection could mitigate the energetic consequences of variation  
29 in ambient temperature. We then (1) quantified the relationship between  
30 ambient temperature and torpor use, (2) simulated daily energy expenditure over  
31 a range of roost temperatures, and (3) quantified the influence of roost  
32 temperature on roost selection.

33 **3.** Bats did not select roosts with specific thermal characteristics, nor did ambient  
34 temperature alter patterns of roost selection. This was likely because bats could  
35 modulate use of torpor to maintain a consistent level of energy expenditure over  
36 the course of a day, irrespective of ambient temperature.

37 **4.** Thermoregulatory processes in heterotherms differ from that of homeotherms  
38 and poikilotherms, including through behaviours as universal as habitat  
39 selection. Unlike homeotherms, bats face little pressure to select warm habitats  
40 to avoid heat loss during periods of inactivity—bats can use daily torpor to fully  
41 offset any increases in energy expenditure from maintaining homeothermy at  
42 colder temperatures.

43

44 **Key-words** Bayesian hierarchical models, climate change, daily torpor, fringed  
45 myotis (*Myotis thysanodes*), heterothermy, temporal heterothermy, VHF telemetry

46

47 **1. Introduction**

48 The thermal environments in which organisms live strongly influence metabolic rates  
49 (Huey and Stevenson 1979, Brown et al. 2004, Pörtner and Farrell 2008). Among  
50 homeotherms—which regulate body temperature internally within a narrow range to  
51 optimize physiological processes—metabolic heat production is tightly regulated in  
52 response to variation in temperature in the surrounding environment (i.e., ambient  
53 temperature; Lowell and Spiegelman 2000). Controlling body temperature thus requires  
54 increased energy expenditure by homeotherms when ambient temperatures depart from  
55 the thermoneutral zone (i.e., the range of ambient temperatures in which homeotherms  
56 can regulate body temperature with minimal metabolic effort; McNab 2002). Because  
57 survival and reproduction require that energy intake equal or exceed energy  
58 expenditure, operating in ambient temperatures outside the thermoneutral zone can  
59 reduce fitness over time (Angilletta et al. 2010, Boyles et al. 2011).

60 Although the influence of ambient temperature on metabolism in homeotherms  
61 is understood relatively well, many animals are heterotherms that can temporarily or  
62 partially enter poikilothermy (in which body temperature tracks ambient temperature;  
63 Withers et al. 2016). Heterothermy is common among mammals and birds (Geiser,  
64 2004; Geiser & Ruf, 1995; McKechnie & Mzilikazi, 2011; Ruf & Geiser, 2015) and  
65 can reduce energy expenditure during both hot and cold periods (Körtner & Geiser  
66 2008, Stawski and Geiser 2012, Boyles et al. 2016, Nowack et al. 2017, Reher &  
67 Dausmann 2021). As ambient temperatures depart the thermoneutral zone,  
68 heterotherms can relax internal controls on metabolism; this physiological response  
69 allows body temperature to track ambient temperature and reduce or altogether  
70 eliminate the increased energetic costs of maintaining stable body temperatures outside  
71 the thermoneutral zone (Levesque et al. 2016). Heterotherms often achieve this by

72 entering daily torpor, a short-term hypometabolic state of inactivity in which animals  
73 allow body temperature to track ambient temperature (Ruf and Geiser 2015).

74 The influence of ambient temperature on daily torpor use (and therefore energy  
75 expenditure) by heterotherms is dynamic. Heterotherms use daily torpor more as  
76 ambient temperatures decrease below the thermoneutral zone (Chruszcz & Barclay,  
77 2002; Geiser & Broome, 1993; Geiser & Kenagy, 1988; Rambaldini & Brigham, 2008;  
78 Solick & Barclay, 2006), but it is unclear how this tendency influences cumulative  
79 energy expenditure over periods of time covering sequential bouts of homeothermy and  
80 torpor. For a given period of time, total energy expenditure for heterotherms depends  
81 on (1) the duration and frequency of bouts of torpor during that time frame, (2) ambient  
82 temperatures during that time frame, and (3) the difference in metabolic rates between  
83 torpor and homeothermy at a given ambient temperature. Energy expenditure might  
84 increase as ambient temperatures fall below the thermoneutral zone: even though  
85 heterotherms save energy by using torpor, such energy savings could be exceeded by  
86 the increased energetic costs of maintaining homeothermy in colder ambient  
87 temperatures (Fig. 1B). In this scenario, periodic bouts of torpor dampen but do not  
88 completely offset increases in energy expenditure during periods of homeothermy at  
89 cold ambient temperatures. Alternatively, it is possible that energy expenditure by  
90 heterotherms is stable through a wide range of ambient temperatures because energy  
91 savings from using progressively more torpor at progressively colder ambient  
92 temperatures closely matches increases in energy expenditure from maintaining  
93 homeothermy at colder ambient temperatures (Fig. 1C). Finally, as ambient  
94 temperatures decline, the energetic savings from torpor could more than offset the  
95 increased energy expenditure necessary to maintain homeothermy (Fig. 1D).

96           Such relationships between ambient temperature and energy expenditure have  
97 cascading repercussions for other aspects of an animal's life. For example, animals  
98 seeking to avoid fitness costs from extreme ambient temperatures often move to areas  
99 of the landscape with more suitable ambient temperatures (Kearney et al. 2009, Sunday  
100 et al. 2014). Animals thus often select habitats that help them maintain body  
101 temperatures near optimal levels (Huey 1991, Melin et al. 2014, Freitas et al. 2016). At  
102 ambient temperatures below the thermoneutral zone, homeotherms select areas of the  
103 landscape where they can reduce heat loss (Courbin et al. 2017, Matthews et al. 2019)  
104 or increase heat gain from the environment (Poole et al. 2016, O'Keefe and Loeb 2017).  
105 At ambient temperatures that exceed the thermoneutral zone, homeotherms select areas  
106 of the landscape where they can increase heat loss (McCann et al. 2016, Sarmiento et al.  
107 2019) or reduce heat gain from the environment (Hovick et al. 2014, Alston et al. 2020).  
108 Because it allows animals some control over their thermal environments, ecologists and  
109 evolutionary biologists have long been interested in such temperature-dependent habitat  
110 selection by which individuals can expand the range of climatic conditions that they  
111 can tolerate (Huey 1991, Morris 2011).

112           Temperature-driven habitat selection is less understood for heterotherms than  
113 for homeotherms, but patterns of temperature-driven habitat selection are likely to be  
114 different between animals that use these two metabolic pathways. Homeotherms have  
115 relatively fixed relationships between ambient temperature and metabolic rate, and thus  
116 often consistently select habitats to maintain optimal body temperatures with little  
117 metabolic effort (e.g., Poole et al. 2016, Courbin et al. 2017, Sarmiento et al. 2019). In  
118 contrast, looser relationships between ambient temperature and metabolic rate for  
119 heterotherms may allow heterotherms to select habitats with less regard to ambient  
120 temperature, or even to prefer habitats that might be colder than ideal for homeotherms.

121 For example, heterothermic Australian owl-nightjars (*Aegotheles cristatus*)  
122 preferentially roost in colder, less thermally stable tree cavities, whereas homeothermic  
123 cavity-nesting birds typically select warmer, more thermally stable tree cavities  
124 (Doucette et al. 2011). Empirical data on habitat selection by heterotherms is rare,  
125 however, particularly for free-ranging animals.

126         Uncertainty surrounding the form and strength of relationships between ambient  
127 temperature and energy expenditure limit our understanding of temperature-driven  
128 habitat selection by heterotherms. For an animal attempting to minimize energy  
129 expenditure during periods of inactivity, each of the hypothetical relationships between  
130 energy expenditure and ambient temperature in Fig. 1 would result in a different pattern  
131 of habitat selection. A heterotherm exhibiting the relationship shown by the red (B) line  
132 in Fig. 1 should select warm microhabitats to save energy, similar to homeotherms. A  
133 heterotherm exhibiting the relationship shown by the grey (C) line in Fig. 1 should not  
134 select microhabitats based on their thermal characteristics. This pattern of habitat  
135 selection would also diverge from the pattern followed by homeotherms. A heterotherm  
136 exhibiting the relationship shown by the blue (D) line in Fig. 1 should select cool  
137 microhabitats to save energy, opposite of the pattern followed by homeotherms.  
138 Empirical tests of the influence of ambient temperature on energy expenditure are thus  
139 needed to understand how ambient temperature drives habitat selection for  
140 heterotherms.

141         We sought to understand how ambient temperature influences energy  
142 expenditure, and how energy expenditure in turn influences habitat selection, in a bat  
143 that is widely distributed throughout western North America (fringed myotis, *Myotis*  
144 *thysanodes*). Like other bats inhabiting temperate latitudes, fringed myotis are  
145 heterotherms that are believed to select diurnal roosts to minimize energy expenditure

146 during diurnal periods of inactivity (Sedgeley 2001, Willis and Brigham 2005,  
147 Ruczyński 2006). At temperate latitudes, temperature within roosts can vary  
148 substantially throughout the day and year, and ambient temperature influences the  
149 amount of time bats spend in torpor each day. Like other heterotherms, bats spend more  
150 time in torpor when it is cold than when it is hot (Chruszcz and Barclay 2002, Solick  
151 and Barclay 2006, Rambaldini and Brigham 2008). We hypothesized that differences  
152 in energy expenditure at roosts of varying temperatures drive patterns of roost selection  
153 (i.e., bats select roosts that minimize energy expenditure). Specifically, we weighed  
154 evidence for four competing sets of predictions (Fig. 2).

155 *Prediction Set 1:* Bats select warm roosts regardless of ambient temperature. In this  
156 scenario, energy expenditure during the day should be higher in cool roosts than in  
157 warm roosts (Fig. 2.1A) because the energetic benefits from being warmer when bats  
158 are maintaining homeothermy outweigh the energetic costs of spending less time in  
159 torpor. If this is the case, bats should select roosts that are warmer compared to available  
160 structures on the landscape (Fig. 2.1B); this pattern of selection should be consistent  
161 regardless of ambient temperature during the day (Fig. 2.1C).

162 *Prediction Set 2:* Bats select cool roosts regardless of ambient temperature. In this  
163 scenario, energy expenditure during the day should be higher in warm roosts than in  
164 cool roosts (Fig. 2.2A) because the energetic benefits from spending more time in torpor  
165 outweigh the energetic costs of being colder when bats are maintaining homeothermy.  
166 If this is the case, bats should select roosts that are cooler compared to available  
167 structures on the landscape (Fig. 2.2B); this pattern of selection should be consistent  
168 regardless of ambient temperature during the day (Fig. 2.2C).

169 *Prediction Set 3:* Bats do not alter roost selection as ambient temperatures change. In  
170 this scenario, energy expenditure during the day is roughly equal across roosts of all

171 temperatures (Fig. 2.3A). This could occur if bats modulate use of torpor such that roost  
172 temperatures over the course of a day have little influence on overall energy  
173 expenditure. In this case, bats should select roosts that are similar in temperature to  
174 available structures on the landscape (Fig. 2.3B), and this pattern of selection should be  
175 consistent regardless of ambient temperature during the day (Fig. 2.3C).

176 *Prediction Set 4:* Bats select cool roosts on cool days and warm roosts on warm days  
177 (shifting roost selection). In this scenario, energy expenditure is lower in cool roosts  
178 than in warm roosts on cool days, lower in warm roosts than in cool roosts on warm  
179 days, and consistently higher in roosts at intermediate ambient temperatures (Fig.  
180 2.4A). This may arise because of threshold effects from a non-linear relationship  
181 between ambient temperature and torpor use. Namely, a threshold may exist above  
182 which homeothermy requires relatively little energy even as bats spend little time in  
183 torpor, but below which bats save a substantial amount of energy by using torpor. Near  
184 the threshold, however, bats may use relatively little torpor even as maintaining  
185 homeothermy is relatively energetically costly. In this case, bats should select roosts  
186 that are roughly the same temperature on average as available structures on the  
187 landscape (though the distribution may be bimodal; Fig. 2.4B), and temperatures in  
188 roosts should be positively correlated with ambient temperature (Fig. 2.4C).

189

## 190 **2. Materials and methods**

### 191 **2.1 Study Area and Species**

192 We conducted our study during the summers of 2017 and 2018 on Jewel Cave  
193 National Monument (43° 45' N, 103° 45' W) and surrounding areas of Black Hills  
194 National Forest in South Dakota, USA. Our study area is described in Alston,  
195 Abernethy, Keinath, & Goheen (2019). Mean monthly summer high temperatures



196 range between 22 – 27°C and mean monthly summer precipitation ranges between 60  
197 – 80 mm (Western Regional Climate Center 2018). Open ponderosa pine (*Pinus*  
198 *ponderosa*) forests dominate, with Rocky Mountain juniper (*Juniperus scopulorum*)  
199 and quaking aspen (*Populus tremuloides*) occurring locally. Forests are actively  
200 managed to prevent wildfire, and those managed by the US Forest Service and private  
201 landowners also undergo intensive logging. Forests form a mosaic with northern  
202 mixed-grass prairie where a large stand-replacing fire occurred in in 2000. A large  
203 system of caves and several smaller caves lie underground, and the landscape exhibits  
204 substantial topographic relief in the form of intersecting canyon systems and rock  
205 outcrops.

206 Fringed myotis roost in caves, mines, rock crevices, tree cavities, and under  
207 the sloughing bark of dead trees, and forage in forest canopy and riparian areas  
208 (O’Farrell and Studier 1980). We chose to focus on males because sex ratios of bats in  
209 the Black Hills are heavily (>90%) male-biased (a common pattern in high-elevation  
210 areas; Barclay, 1991; Cryan, Bogan, & Altenbach, 2000; Senior, Butlin, &  
211 Altringham, 2005), because male *M. thysanodes* usually roost solitarily (O’Farrell and  
212 Studier 1980), and because male bats maintain consistent patterns of torpor use  
213 throughout the reproductive season (unlike females, which alter patterns of torpor use  
214 at different stages of reproduction; Chruszcz & Barclay, 2002; Dzal & Brigham,  
215 2013; Johnson & Lacki, 2014).

216

## 217 **2.2 Capture and VHF Telemetry**

218 We used mist nets to capture bats over permanent and semi-permanent water sources  
219 (e.g., springs, stock tanks, and stock ponds). From June through August of 2017 and

220 2018, we netted 20 and 49 nights, respectively, at 15 water sources. We opened mist  
221 nets at civil sunset and closed them after five hours or during inclement weather.

222 We affixed temperature-sensitive VHF transmitters (LB-2XT model .28/.33 g  
223 – Holohil Systems Ltd., Carp, ON, Canada) between the scapulae of adult male  
224 fringed myotis with latex surgical adhesive (Osto-Bond, Montreal Ostomy, Montreal,  
225 QC, Canada). The transmitters measure and transmit data on skin temperature—an  
226 accurate proxy for body temperature—of bats, enabling researchers to delineate bouts  
227 of torpor (Barclay et al. 1996, Chruszcz and Barclay 2002, Stawski and Geiser 2010).  
228 All transmitters weighed <5% of the mass of the bat (Aldridge and Brigham 1988).  
229 We tracked bats to roosts each day transmitters were active, and installed VHF data  
230 loggers (SRX800-D1 – Lotek Wireless Inc., Newmarket, ON, Canada) that collected  
231 and recorded data transmitted by the VHF transmitters. All protocols were approved  
232 by the University of Wyoming and National Park Service Animal Care and Use  
233 Committees and met guidelines approved by the American Society of Mammalogists  
234 for research on wild mammals (Sikes and the Animal Care and Use Committee of the  
235 American Society of Mammalogists 2016).

236

### 237 **2.3 Energetic Modelling**

238 To quantify torpor use, we delineated bouts of torpor from data logger readings that  
239 captured full days (i.e., from roost entry in the morning to roost exit in the evening) of  
240 skin temperature data from individual bats. This was a fraction of total days in which  
241 we located roosts, because bats typically were not located until after they entered roosts.  
242 We defined torpor as beginning when skin temperature dropped below the lowest skin  
243 temperature of bats maintaining homeothermy during a day and ending when skin  
244 temperature began a steep rise that led to bats re-entering homeothermy or leaving a

245 roost (as recommended by Barclay, Lausen, & Hollis, 2001; Fig. A1). Because fat  
246 reserves and body mass can substantially alter the amount of time spent in torpor  
247 (Wojciechowski et al. 2007, Stawski and Geiser 2010, Vuarin et al. 2013), we also  
248 controlled for the body mass of each individual at time of capture on torpor duration.  
249 We then used the modelling software ‘Stan’ (Carpenter et al. 2017) via the R package  
250 ‘brms’ (Bürkner 2017) to build a linear Bayesian hierarchical model to quantify the  
251 influence of ambient temperature and body mass on torpor duration while accounting  
252 for non-independence among data points collected from the same individual. The model  
253 included 3 chains run for 13,000 iterations (1,000 iterations of warm-up and 12,000  
254 iterations of sampling). We assessed chain convergence using the Gelman-Rubin  
255 diagnostic ( $\hat{R}$ ) and precision of parameter estimation using effective sample size.  $\hat{R} <$   
256 1.01 and effective sample sizes  $> 10,000$  represent acceptable convergence and  
257 parameter precision (Gelman et al. 2013, Kruschke 2015). We used leave-one-out cross  
258 validation to check model fit using the R packages ‘loo’ (Vehtari et al. 2017) and  
259 ‘bayesplot’ (Gabry et al. 2019) to visually assess the cross-validated probability integral  
260 transform.

261 To quantify energy expenditure in bats, we combined published estimates of  
262 metabolic rates of fringed myotis as a function of temperature (Studier and O’Farrell  
263 1976) and the linear model of the influence of ambient temperature on torpor use to  
264 simulate the influence of roost temperature on energy expenditure. Specifically, we  
265 simulated minute-by-minute energy expenditure by bats in each used roost between  
266 0445 hrs and 2100 hrs (typical entry and exit times for bats in our study) on each day  
267 over the duration of our study period. We modeled torpor use as a function of decision  
268 rules that reflect torpor use observed over the course of our study (raw data presented  
269 in Table A1). Specifically, we assumed that bats entered torpor immediately upon

270 entering roosts, exited torpor after an interval determined by roost temperature, and  
271 remained in homeothermy for the rest of the time spent in the roost except for a shorter  
272 bout of torpor in the evening. We further assumed that bats would use 86.9% of the  
273 duration of daily torpor in the morning and 13.1% in the afternoon unless the afternoon  
274 bout of torpor would be less than 30 minutes in duration, in which case 100% of the  
275 day's torpor would occur in the morning period. We also assumed that the mean  
276 duration of torpor that we observed would be used in the baseline "average" roost, with  
277 the duration of torpor in warmer and cooler roosts determined by the slope of the  
278 modeled relationship between ambient temperature and torpor use described in the  
279 above paragraph. To account for uncertainty in our estimate of the slope of the  
280 relationship between ambient temperature and daily torpor use, for each roost on each  
281 day we randomly drew a different slope estimate for this relationship from the posterior  
282 distribution of slope estimates from the model described in the prior paragraph.

283

#### 284 **2.4 Roost Characterization**

285 To characterize rock roost structures, we collected data for 31 roosts and 62  
286 randomly sampled available (i.e., unused by bats in our study) roosts. Hereafter, we  
287 distinguish between 'used roosts' and available but unused 'available roosts'; we use  
288 the term 'roost structure' when we refer to both used and available roosts  
289 simultaneously. We identified available rock roosts in two ways: at each used roost,  
290 we 1) located the nearest rock crevice large enough to hold a bat, and 2) generated a  
291 paired point in a random cardinal direction a random distance between 100 – 300 m  
292 away, then located the nearest rock crevice large enough to hold a bat.

293 To characterize tree roost structures, we collected data for 9 used roosts and 36  
294 randomly sampled available roosts. We identified available tree roosts in two ways: at

295 each used roost, we 1) located the nearest snag and selected the nearest cavity large  
296 enough to hold a bat, and 2) generated a paired point in a randomly determined  
297 distance between 100 – 300 m away, in a randomly-determined (cardinal) direction,  
298 then located the nearest tree cavity large enough to hold a bat. For each available  
299 point, we placed data loggers in two locations: one in a cavity in the trunk and one  
300 underneath sloughing bark. We defined available roost trees as any dead tree with a  
301 visible defect (e.g., sloughing bark or cavities) sufficiently large to hold a bat. This  
302 description fit every tree in which we found a bat roosting.

303 In Summer 2018, we monitored temperatures within both used and available  
304 roosts using data loggers (Model MX2201; Onset Computer Corporation, Bourne,  
305 MA, USA). The first data loggers were deployed on 17 July 2018, and the last data  
306 logger was removed on 8 October 2018. This period of time includes the full range of  
307 daily high temperatures occurring during the active season for bats at our study site.  
308 During data logger deployment and opportunistically thereafter, we checked roost  
309 structures for the presence of bats. We sometimes found bats in used roosts, but we  
310 never found bats in available roosts. When we found bats in used roosts, we waited to  
311 deploy data loggers until there was no bat within the roost.

312 To quantify the thermal characteristics of each roost structure, we calculated the  
313 mean temperature within each roost structure for periods between 0445 and 2100 hrs,  
314 which corresponds with the period in which a bat is likely to be within a roost (Table  
315 A1). To control for potential confounding variables, we also calculated the timing of  
316 the peak temperature in all roost structures (because if two roost structures have the  
317 same mean temperature but peak in temperature at different times, the roost structure  
318 with the later peak will have cooler temperatures in the morning when bats use torpor  
319 most), and the standard deviation of temperature during the day (because stability in

320 roost temperature can be an important factor in roost selection; Sedgeley, 2001). To  
321 quantify the timing of the daily temperature peak, we located the peak temperature in  
322 each roost structure for each day and calculated the mean time of day at which this  
323 occurred over our study period. To quantify thermal stability in roost structures, we  
324 calculated the standard deviation of temperatures between 0445 and 2100 hrs in each  
325 roost structure for each day and calculated the mean daily standard deviation over our  
326 study period. To ensure consistency, we only calculated these values for the period  
327 between July 28 and September 31 (a period in which all data loggers were actively  
328 logging temperatures, and in which average daily high temperatures correspond with  
329 the range a bat might be exposed to during the active season in our study area).

330 We used the R statistical software environment (R Core Team 2020) to quantify  
331 differences between used and available roosts. To determine whether bats select cooler  
332 roosts than those available, we used the modelling software ‘Stan’ (Carpenter et al.  
333 2017) via the R package ‘brms’ (Bürkner 2017) to build a binomial-family Bayesian  
334 model to quantify the influence of mean temperature within roost structures, the timing  
335 of daily peaks in temperature within roost structures, and the standard deviation of  
336 temperatures within roost structures on roost selection. The model included 3 chains  
337 run for 13,000 iterations (1,000 iterations of warm-up and 12,000 iterations of  
338 sampling). We assessed chain convergence using  $\hat{R}$  and precision of parameter  
339 estimation using effective sample size. We checked predictive performance with  
340 receiver operating curve analysis using the R package ‘pROC’ (Robin et al. 2011) and  
341 used the R package ‘bayesplot’ (Gabry et al. 2019) to visually assess binned residual  
342 plots.

343

### 344 **3. Results**

345 We tracked 46 bats to 107 roosts (93 in rocks and 14 in trees) and collected 27 full days  
346 of skin temperature data from 7 bats. Data from 16 data loggers within roost structures  
347 (3 used rock, 12 available rock, 1 available tree) could not be collected because they  
348 were not relocated or were dislodged from roost structures. We thus excluded these data  
349 from analyses, leaving a total of 122 (78 rock, 44 tree) data loggers that collected data  
350 on temperatures within roost structures.

351 Use of torpor stabilized daily energy expenditure across the range of roost  
352 temperatures observed during our telemetry study. In our model of the effect of ambient  
353 temperature on daily torpor duration, 95% credible intervals for the effect of mean  
354 ambient temperature over the course of the day on daily torpor duration did not cross 0  
355 (parameter estimate: -37.4 min; 95% credible intervals: -64.0 – -12.6 min), indicating  
356 that bats spent ca. 37 minutes less in torpor per day for each additional 1°C in daily  
357 mean ambient temperature between 0445 hrs and 2100 hrs (Fig. 3). Assessment of the  
358 cross-validated probability integral transform indicated that model fit was adequate.  
359 When incorporated into our simulation of bat energy expenditure over the course of a  
360 typical day, this estimate of the relationship between ambient temperature and torpor  
361 use led to similar estimates of energy expenditure across temperatures within used  
362 roosts (Fig. 4; blue points). Daily energy expenditure was roughly equivalent in all  
363 roosts. Our estimates for energy expenditure using observed bat behaviour were always  
364 substantially lower and substantially less variable than our estimates for energy  
365 expenditure if bats had remained in homeothermy all day (Fig. 4; red points). Bats that  
366 remain in homeothermy would expend substantially more energy in cool roosts than in  
367 warm roosts.

368 Overall, temperatures in both rock and tree roost structures were similar, though  
369 roost structures in trees were slightly cooler and less stable than roost structures in

370 rocks. During the day, rock crevices averaged 20.1°C (range: 16.5° – 24.2°C) while tree  
371 roost structures averaged 18.8°C (range: 16.1° – 25.5°C). Daily maximum temperatures  
372 within rock crevices averaged 26.1°C (range: 17.9° – 40.8°C), while daily maximum  
373 temperatures within tree roost structures averaged 28.3°C (range: 21.0° – 52.1°C).  
374 Temperatures within rock crevices peaked at 1441 hrs on average (range = 1005 – 1742  
375 hrs), while temperatures within tree roost structures peaked at 1357 hrs on average  
376 (range = 1056 – 1659 hrs). Ambient temperature strongly influenced temperatures  
377 within roost structures. Temperatures within rock crevices at each hour (in °C) followed  
378 the equation  $7.67 + 0.73 \times \text{ambient temperature}$  ( $R^2 = 0.54$ ), while temperatures within  
379 tree roost structures at each hour followed the equation  $1.63 + 1.00 \times \text{ambient}$   
380  $\text{temperature}$  ( $R^2 = 0.63$ ). We pooled rock and tree roost structures in roost selection  
381 analyses, but we report descriptive statistics for each type of roost structure in Appendix  
382 1.

383         Despite substantial variation in temperatures among roost structures, we found  
384 little evidence that the thermal characteristics of used roosts differed from those of  
385 available roosts (Fig. 5). In our model of roost selection, 95% credible intervals for the  
386 effect of mean ambient temperature over the course of the day on roost selection did  
387 not cross 0 (parameter estimate: 0.30; 95% credible intervals: 0.04 – 0.58), indicating  
388 that bats were more likely to roost in warm roost structures than cool ones. However,  
389 predictive performance was poor (AUC: 0.650), and overall, used roosts (20.1°C) had  
390 similar mean temperatures as available roosts (19.4°C; Fig. 5A). Bats also did not  
391 differentiate between roost structures with temperatures peaking late in the day versus  
392 roost structures with temperatures peaking early in the day (Fig 5B). In our model of  
393 roost selection, 95% credible intervals for the effect of the timing of daily peaks in  
394 temperature on roost selection crossed 0 (parameter estimate: -0.10; 95% credible



395 intervals: -0.34 – 0.14). Overall, used roosts (1408 hrs) had similar timing of peak  
396 temperature as available roosts (1434 hrs). Bats also did not differentiate between roosts  
397 with stable temperatures and those with more variable temperatures (Fig. 5C). In our  
398 model of roost selection, 95% credible intervals for the effect of standard deviation in  
399 roost temperature over the course of the day on roost selection crossed 0 (parameter  
400 estimate: -0.20; 95% credible intervals: -0.47 – 0.06) Overall, there was no difference  
401 in the standard deviation of temperatures of used roosts (7.0°C) and available roosts  
402 (7.0°C). Finally, there was also no relationship between ambient temperature on a given  
403 day and mean temperatures within roosts used on that day ( $R^2 = 0.03$ ;  $p = 0.132$ ; Fig.  
404 6).

405

#### 406 **4. Discussion**

407 The thermal environments in which animals operate strongly influence physiological  
408 processes, and can thereby pose substantial challenges to animals living in variable  
409 environments. How animals overcome these challenges is a central question in animal  
410 ecology. Attempts to address this question have focused largely on poikilotherms and  
411 homeotherms. Because heterotherms are neither as strongly tied to narrow ranges of  
412 body temperature as homeotherms nor as subject to ambient temperatures as  
413 poikilotherms, heterotherms are likely to respond to heat and cold fundamentally  
414 differently than either homeotherms or poikilotherms.

415 We sought to better understand how variation in ambient temperature influences  
416 use of daily torpor and habitat selection for heterotherms, using a species of bat as a  
417 model system. Simulations of energy expenditure at varying roost temperature  
418 indicated that bats can modulate use of torpor to maintain a consistent level of energy  
419 expenditure over the course of a day over a wide range of thermal conditions within

420 roosts. As a result, roost selection was not driven by temperatures within roosts. Our  
421 results provide evidence for Prediction Set 3 (no selection) in our introduction (Fig. 2).

422 The energetic savings associated with torpor—particularly at cooler  
423 temperatures—likely result in habitat selection that differs substantially from habitat  
424 selection by homeotherms. For example, we showed that use of daily torpor can reduce  
425 the energetic costs of inhabiting roosts that are colder than optimal for homeotherms. If  
426 bats were strict homeotherms, the energetic costs of inhabiting cool roosts would have  
427 been substantially higher (Fig. 4), which would likely result in bats selecting warm  
428 roosts. In contrast, heterothermic bats face little pressure to select warm habitats, even  
429 on relatively cool days.

430 Individual traits (e.g., sex, age, and reproductive condition) can alter the  
431 energetic costs and benefits of using torpor for heterotherms, thereby driving the extent  
432 to which habitat selection might follow the pattern demonstrated in this study. For  
433 example, roost selection by bats varies by sex, age, and reproductive condition (Elmore  
434 et al. 2004, Hein et al. 2008). While male bats in our study did not select roosts with  
435 specific thermal characteristics, female bats seem to use less torpor and prefer warmer  
436 roosts than males while pregnant or raising young, and females typically aggregate in  
437 social maternity colonies rather than roosting solitarily (Hamilton and Barclay 1994,  
438 Kerth et al. 2001, Ruczyński 2006). Compared to males, then, roost selection by females  
439 will likely be governed more strongly by thermal characteristics (though social  
440 thermoregulation via huddling can influence thermal conditions within roosts more than  
441 a roost’s physical and environmental characteristics; Pretzlaff, Kerth, & Dausmann,  
442 2010; Willis & Brigham, 2007). Further research on the roles of sex, age, and  
443 reproductive condition on torpor use in heterotherms (and thus habitat selection by  
444 heterotherms) is likely to reveal important context for our findings.

445           Climate warming increases energy expenditure for many animals, including  
446 both poikilotherms (Pörtner and Knust 2007, Dillon et al. 2010) and homeotherms  
447 (Humphries et al. 2002, Şekercioğlu et al. 2012, Albright et al. 2017). However, the  
448 degree to which climate warming will impact heterotherms is poorly understood,  
449 largely due to a lack of data on relationships between ambient temperature, torpor use,  
450 and thermolability that is needed to accurately model the influence of ambient  
451 temperature on heterotherm metabolism (Levesque et al. 2016). Our results indicate  
452 that temperature-dependent use of torpor may stabilize energy expenditure, and thus  
453 buffer against the energetic costs associated with variable ambient temperatures.  
454 However, most of the energetic savings derived from heterothermy arise during periods  
455 of cold. Increased temperatures due to climate change may thus reduce the relative  
456 energetic benefits of heterothermy compared to homeothermy, as homeotherms  
457 experience fewer and milder periods of cold.

458           In conclusion, we showed that a heterothermic bat selected neither warm nor  
459 cool roosts, because bats can modulate torpor use to stabilize energy expenditure over  
460 the course of a day. Unlike homeotherms, bats face little pressure to select warm  
461 habitats to avoid heat loss during periods of inactivity—when maintaining a high, stable  
462 body temperature becomes energetically costly, bats can enter torpor to reduce energy  
463 expenditure. Although such fine-tuning of torpor use to stabilize daily energy  
464 expenditure is intuitive, it has not been demonstrated in previous studies to the best of  
465 our knowledge. Furthermore, our study provides evidence that the thermoregulatory  
466 behaviours of heterotherms are likely to diverge in meaningful ways from those of  
467 homeotherms, including in behaviours as basic and pervasive as habitat selection.

468

469 **Acknowledgements**

470 Many thanks to L. Boodoo, C. McFarland, E. Greene, B. Tabor, and B. Phillips for  
471 help with fieldwork; L. Shoemaker, D. Laughlin, J. Rick, and D. Goodhouse for  
472 helpful comments on pre-submission versions of this manuscript; and P. Ortegon, D.  
473 Licht, M. Wiles, D. Austin, B. Phillips, E. Thomas, and A. Stover for their logistical  
474 support of this project. Research funding was provided by the National Park Service,  
475 the Department of Zoology and Physiology at the University of Wyoming, the Berry  
476 Ecology Center, the American Society of Mammalogists, Prairie Biotic Research,  
477 Inc., and the Wyoming Chapter of The Wildlife Society. The findings and conclusions  
478 in this article are those of the authors and do not necessarily represent the views of the  
479 U.S. Fish and Wildlife Service or the National Park Service. We conducted field  
480 research on the traditional lands of the Lakǰóta, Sahnish, Tsitsistas, Hinono'eino,  
481 K'oigu, and Ná'ishą peoples. The Lakǰóta people know this land as Ĥe Sápa and  
482 Pahá Sápa, which was taken by the United States in the Agreement of 1877 in  
483 violation of the 1868 Fort Laramie Treaty.

484

## 485 **Data Accessibility**

486 Data and code used in analyses for this paper will be archived on *Zenodo* upon  
487 acceptance of this manuscript.

488

## 489 **References**

490 Albright, T.P., D. Mutiibwa, A. R. Gerson, E. K. Smith, W. A. Talbot, J. J. O'Neill,  
491 A. E. McKechnie, and B. O. Wolf. 2017. Mapping evaporative water loss in  
492 desert passerines reveals an expanding threat of lethal dehydration.  
493 *Proceedings of the National Academy of Sciences* 114:2283-2288.

- 494 Aldridge, H. D. J. N., and R. M. Brigham. 1988. Load carrying and maneuverability  
495 in an insectivorous bat: a test of the 5% “rule” of radio-telemetry. *Journal of*  
496 *Mammalogy* 69:379–382.
- 497 Alston, J. M., I. M. Abernethy, D. A. Keinath, and J. R. Goheen. 2019. Roost  
498 selection by male northern long-eared bats (*Myotis septentrionalis*) in a  
499 managed fire-adapted forest. *Forest Ecology and Management* 446:251–256.
- 500 Alston, J. M., M. J. Joyce, J. A. Merkle, and R. A. Moen. 2020. Temperature shapes  
501 movement and habitat selection by a heat-sensitive ungulate. *Landscape*  
502 *Ecology*:790048.
- 503 Angilletta, M. J., B. S. Cooper, M. S. Schuler, and J. G. Boyles. 2010. The evolution  
504 of thermal physiology in endotherms. *Frontiers in Bioscience* E2:861–881.
- 505 Barclay, R. M., C. L. Lausen, and L. Hollis. 2001. What’s hot and what’s not:  
506 defining torpor in free-ranging birds and mammals. *Canadian Journal of*  
507 *Zoology* 79:1885–1890.
- 508 Barclay, R. M. R. 1991. Population structure of temperate zone insectivorous bats in  
509 relation to foraging behaviour and energy demand. *Journal of Animal Ecology*  
510 60:165–178.
- 511 Barclay, R. M. R., M. C. Kalcounis, L. H. Crampton, C. Stefan, M. J. Vonhof, L.  
512 Wilkinson, and R. M. Brigham. 1996. Can external radiotransmitters be used  
513 to assess body temperature and torpor in bats? *Journal of Mammalogy*  
514 77:1102–1106.
- 515 Boyles, J. G., L. P. McGuire, E. Boyles, J. P. Reimer, C. A. C. Brooks, R. W.  
516 Rutherford, T. A. Rutherford, J. O. Whitaker, and G. F. McCracken. 2016.  
517 Physiological and behavioral adaptations in bats living at high latitudes.  
518 *Physiology & Behavior* 165:322–327.

- 519 Boyles, J. G., F. Seebacher, B. Smit, and A. E. McKechnie. 2011. Adaptive  
520 thermoregulation in endotherms may alter responses to climate change.  
521 *Integrative and Comparative Biology* 51:676–690.
- 522 Brown, J. H., J. F. Gillooly, A. P. Allen, V. M. Savage, and G. B. West. 2004. Toward  
523 a metabolic theory of ecology. *Ecology*:1771–1789.
- 524 Bürkner, P.-C. 2017. brms: an R package for Bayesian multilevel models using Stan.  
525 *Journal of Statistical Software* 80:1–28.
- 526 Carpenter, B., A. Gelman, M. D. Hoffman, D. Lee, B. Goodrich, M. Betancourt, M.  
527 Brubaker, J. Guo, P. Li, and A. Riddell. 2017. Stan: a probabilistic  
528 programming language. *Journal of Statistical Software* 76.
- 529 Chruszcz, B. J., and R. M. R. Barclay. 2002. Thermoregulatory ecology of a solitary  
530 bat, *Myotis evotis*, roosting in rock crevices. *Functional Ecology* 16:18–26.
- 531 Courbin, N., C. Dussault, A. Veillette, M.-A. Giroux, and S. D. Côté. 2017. Coping  
532 with strong variations in winter severity: plastic habitat selection of deer at  
533 high density. *Behavioral Ecology* 28:1037–1046.
- 534 Cryan, P. M., M. A. Bogan, and J. S. Altenbach. 2000. Effect of elevation on  
535 distribution of female bats in the Black Hills, South Dakota. *Journal of*  
536 *Mammalogy* 81:719–725.
- 537 Dillon, M. E., G. Wang, and R. B. Huey. 2010. Global metabolic impacts of recent  
538 climate warming. *Nature* 467:704–706.
- 539 Doucette, L. I., R. M. Brigham, C. R. Pavey, and F. Geiser. 2011. Roost type  
540 influences torpor use by Australian owlet-nightjars. *Naturwissenschaften*  
541 98:845.

- 542 Dzal, Y. A., and R. M. Brigham. 2013. The tradeoff between torpor use and  
543 reproduction in little brown bats (*Myotis lucifugus*). *Journal of Comparative*  
544 *Physiology B* 183:279–288.
- 545 Elmore, L. W., D. A. Miller, and F. J. Vilella. 2004. Selection of diurnal roosts by red  
546 bats (*Lasiurus borealis*) in an intensively managed pine forest in Mississippi.  
547 *Forest Ecology and Management* 199:11–20.
- 548 Freitas, C., E. M. Olsen, H. Knutsen, J. Albrechtsen, and E. Moland. 2016.  
549 Temperature-associated habitat selection in a cold-water marine fish. *Journal*  
550 *of Animal Ecology* 85:628–637.
- 551 Gabry, J., D. Simpson, A. Vehtari, M. Betancourt, and A. Gelman. 2019.  
552 Visualization in Bayesian workflow. *Journal of the Royal Statistical Society:*  
553 *Series A (Statistics in Society)* 182:389–402.
- 554 Geiser, F. 2004. Metabolic rate and body temperature reduction during hibernation  
555 and daily torpor. *Annual Review of Physiology* 66:239–274.
- 556 Geiser, F., and L. S. Broome. 1993. The effect of temperature on the pattern of torpor  
557 in a marsupial hibernator. *Journal of Comparative Physiology B* 163:133–137.
- 558 Geiser, F., and G. J. Kenagy. 1988. Torpor duration in relation to temperature and  
559 metabolism in hibernating ground squirrels. *Physiological Zoology* 61:442–  
560 449.
- 561 Geiser, F., and T. Ruf. 1995. Hibernation versus daily torpor in mammals and birds:  
562 physiological variables and classification of torpor patterns. *Physiological*  
563 *Zoology* 68:935–966.
- 564 Gelman, A., J. B. Carlin, H. S. Stern, D. B. Dunson, A. Vehtari, and D. B. Rubin.  
565 2013. *Bayesian Data Analysis*. Third. CRC Press, Boca Raton, FL, USA.

- 566 Hall, L. E., and A. D. Chalfoun. 2019. Behavioural plasticity modulates temperature-  
567 related constraints on foraging time for a montane mammal. *Journal of Animal*  
568 *Ecology* 88:363–375.
- 569 Hamilton, I. M., and R. M. R. Barclay. 1994. Patterns of daily torpor and day-roost  
570 selection by male and female big brown bats (*Eptesicus fuscus*). *Canadian*  
571 *Journal of Zoology* 72:744–749.
- 572 Hein, C. D., S. B. Castleberry, and K. V. Miller. 2008. Sex-specific summer roost-site  
573 selection by Seminole bats in response to landscape-level forest management.  
574 *Journal of Mammalogy* 89:964–972.
- 575 Hovick, T. J., R. D. Elmore, B. W. Allred, S. D. Fuhlendorf, and D. K. Dahlgren.  
576 2014. Landscapes as a moderator of thermal extremes: a case study from an  
577 imperiled grouse. *Ecosphere* 5:1–12.
- 578 Huey, R. B. 1991. Physiological consequences of habitat selection. *American*  
579 *Naturalist* 137:S91–S115.
- 580 Huey, R. B., and R. D. Stevenson. 1979. Integrating thermal physiology and ecology  
581 of ectotherms: a discussion of approaches. *Integrative and Comparative*  
582 *Biology* 19:357–366.
- 583 Humphries, M. M., D. W. Thomas, and J. R. Speakman. 2002. Climate-mediated  
584 energetic constraints on the distribution of hibernating mammals. *Nature*  
585 418:313–316.
- 586 Johnson, J. S., and M. J. Lacki. 2014. Effects of reproductive condition, roost  
587 microclimate, and weather patterns on summer torpor use by a vespertilionid  
588 bat. *Ecology and Evolution* 4:157–166.



- 589 Kearney, M., R. Shine, and W. P. Porter. 2009. The potential for behavioral  
590 thermoregulation to buffer “cold-blooded” animals against climate warming.  
591 *Proceedings of the National Academy of Sciences* 106:3835–3840.
- 592 Kerth, G., K. Weissmann, and B. König. 2001. Day roost selection in female  
593 Bechstein’s bats (*Myotis bechsteinii*): a field experiment to determine the  
594 influence of roost temperature. *Oecologia* 126:1–9.
- 595 Körtner, G., and F. Geiser. 2008. The key to winter survival: daily torpor in a small  
596 arid-zone marsupial. *Naturwissenschaften* 96:525.
- 597 Kruschke, J. 2015. *Doing Bayesian analysis*. Second. Academic Press, Waltham, MA,  
598 USA.
- 599 Levesque, D. L., J. Nowack, and C. Stawski. 2016. Modelling mammalian energetics:  
600 the heterothermy problem. *Climate Change Responses* 3:7.
- 601 Lowell, B. B., and B. M. Spiegelman. 2000. Towards a molecular understanding of  
602 adaptive thermogenesis. *Nature* 404:652–660.
- 603 Matthews, S. M., D. S. Green, J. M. Higley, K. M. Rennie, C. M. Kelsey, and R. E.  
604 Green. 2019. Reproductive den selection and its consequences for fisher  
605 neonates, a cavity-obligate mustelid. *Journal of Mammalogy* 100:1305–1316.
- 606 McCann, N. P., R. A. Moen, S. K. Windels, and T. R. Harris. 2016. Bed sites as  
607 thermal refuges for a cold-adapted ungulate in summer. *Wildlife Biology*  
608 22:228–237.
- 609 McKechnie, A. E., and N. Mzilikazi. 2011. Heterothermy in Afrotropical mammals  
610 and birds: a review. *Integrative and Comparative Biology* 51:349–363.
- 611 McNab, B. K. 2002. *The physiological ecology of vertebrates: a view from energetics*.  
612 Cornell University Press, Ithaca, NY, USA.

- 613 Melin, M., J. Matala, L. Mehtätalo, R. Tiilikainen, O.-P. Tikkanen, M. Maltamo, J.  
614 Pusenius, and P. Packalen. 2014. Moose (*Alces alces*) reacts to high summer  
615 temperatures by utilizing thermal shelters in boreal forests – an analysis based  
616 on airborne laser scanning of the canopy structure at moose locations. *Global  
617 Change Biology* 20:1115–1125.
- 618 Morris, D. W. 2011. Adaptation and habitat selection in the eco-evolutionary process.  
619 *Proceedings of the Royal Society B: Biological Sciences* 278:2401–2411.
- 620 Nowack, J., C. Stawski, and F. Geiser. 2017. More functions of torpor and their roles  
621 in a changing world. *Journal of Comparative Physiology B* 187:889–897.
- 622 O’Farrell, M. J., and E. H. Studier. 1980. *Myotis thysanodes*. *Mammalian Species*:1–  
623 5.
- 624 O’Keefe, J. M., and S. C. Loeb. 2017. Indiana bats roost in ephemeral, fire-dependent  
625 pine snags in the southern Appalachian Mountains, USA. *Forest Ecology and  
626 Management* 391:264–274.
- 627 Poole, K. G., R. Serrouya, I. E. Teske, and K. Podrasky. 2016. Rocky Mountain  
628 bighorn sheep (*Ovis canadensis canadensis*) winter habitat selection and  
629 seasonal movements in an area of active coal mining. *Canadian Journal of  
630 Zoology* 94:733–745.
- 631 Pörtner, H. O., and A. P. Farrell. 2008. Physiology and climate change. *Science*  
632 322:690–692.
- 633 Pörtner, H. O., and R. Knust. 2007. Climate change affects marine fishes through the  
634 oxygen limitation of thermal tolerance. *Science* 315:95–97.
- 635 Pretzlaff, I., G. Kerth, and K. H. Dausmann. 2010. Communally breeding bats use  
636 physiological and behavioural adjustments to optimise daily energy  
637 expenditure. *Naturwissenschaften* 97:353–363.

- 638 R Core Team. 2020. R: a language and environment for statistical computing. R  
639 Foundation for Statistical Computing, Vienna, Austria.
- 640 Rambaldini, D. A., and R. M. Brigham. 2008. Torpor use by free-ranging pallid bats  
641 (*Antrozous pallidus*) at the northern extent of their range. Journal of  
642 Mammalogy 89:933–941.
- 643 Reher, S., and K.H. Dausmann. 2021. Tropical bats counter heat by combining torpor  
644 with adaptive hyperthermia. Proceedings of the Royal Society B: Biological  
645 Sciences 288:20202059.
- 646 Robin, X., N. Turck, A. Hainard, N. Tiberti, F. Lisacek, J.-C. Sanchez, and M. Müller.  
647 2011. pROC: an open-source package for R and S+ to analyze and compare  
648 ROC curves. BMC Bioinformatics 12:77.
- 649 Ruczyński, I. 2006. Influence of temperature on maternity roost selection by noctule  
650 bats (*Nyctalus noctula*) and Leisler's bats (*N. leisleri*) in Białowieża Primeval  
651 Forest, Poland. Canadian Journal of Zoology 84:900–907.
- 652 Ruf, T., and F. Geiser. 2015. Daily torpor and hibernation in birds and mammals.  
653 Biological Reviews 90:891–926.
- 654 Sarmiento, W., M. Biel, and J. Berger. 2019. Seeking snow and breathing hard –  
655 behavioral tactics in high elevation mammals to combat warming  
656 temperatures. PLOS ONE 14.
- 657 Sedgeley, J. A. 2001. Quality of cavity microclimate as a factor influencing selection  
658 of maternity roosts by a tree-dwelling bat, *Chalinolobus tuberculatus*, in New  
659 Zealand. Journal of Applied Ecology 38:425–438.
- 660 Şekercioglu, Ç. H., R. B. Primack, and J. Wormworth. 2012. The effects of climate  
661 change on tropical birds. Biological Conservation 148:1–18.

- 662 Senior, P., R. K. Butlin, and J. D. Altringham. 2005. Sex and segregation in temperate  
663 bats. *Proceedings of the Royal Society B: Biological Sciences* 272:2467–2473.
- 664 Sikes, R. S., and Animal Care and Use Committee of the American Society of  
665 Mammalogists. 2016. 2016 guidelines of the American Society of  
666 Mammalogists for the use of wild mammals in research and education. *Journal*  
667 *of Mammalogy* 97:663–688.
- 668 Solick, D. I., and R. M. R. Barclay. 2006. Thermoregulation and roosting behaviour  
669 of reproductive and nonreproductive female western long-eared bats (*Myotis*  
670 *evotis*) in the Rocky Mountains of Alberta. *Canadian Journal of Zoology*  
671 84:589–599.
- 672 Stawski, C., and F. Geiser. 2010. Fat and fed: frequent use of summer torpor in a  
673 subtropical bat. *Naturwissenschaften* 97:29–35.
- 674 Stawski, C., and F. Geiser. 2012. Will temperature effects or phenotypic plasticity  
675 determine the thermal response of a heterothermic tropical bat to climate  
676 change? *PLOS ONE* 7:e40278.
- 677 Studier, E. H., and M. J. O’Farrell. 1976. Biology of *Myotis thysanodes* and *M.*  
678 *lucifugus* (Chiroptera: Vespertilionidae)—III. Metabolism, heart rate,  
679 breathing rate, evaporative water loss and general energetics. *Comparative*  
680 *Biochemistry and Physiology Part A: Physiology* 54:423–432.
- 681 Sunday, J., J. M. Bennett, P. Calosi, S. Clusella-Trullas, S. Gravel, A. L. Hargreaves,  
682 F. P. Leiva, W. C. E. P. Verberk, M. Á. Olalla-Tárraga, and I. Morales-  
683 Castilla. 2019. Thermal tolerance patterns across latitude and elevation.  
684 *Philosophical Transactions of the Royal Society B: Biological Sciences*  
685 374:20190036.

- 686 Sunday, J. M., A. E. Bates, M. R. Kearney, R. K. Colwell, N. K. Dulvy, J. T.  
687 Longino, and R. B. Huey. 2014. Thermal-safety margins and the necessity of  
688 thermoregulatory behavior across latitude and elevation. *Proceedings of the*  
689 *National Academy of Sciences*:201316145.
- 690 Vehtari, A., A. Gelman, and J. Gabry. 2017. Practical Bayesian model evaluation  
691 using leave-one-out cross-validation and WAIC. *Statistics and Computing*  
692 27:1413–1432.
- 693 Vuarin, P., M. Dammhahn, and P.-Y. Henry. 2013. Individual flexibility in energy  
694 saving: body size and condition constrain torpor use. *Functional Ecology*  
695 27:793–799.
- 696 Western Regional Climate Center. 2018. NCDC 1981-2010 monthly normals: Custer,  
697 SD.
- 698 Willis, C. K. R., and R. M. Brigham. 2005. Physiological and ecological aspects of  
699 roost selection by reproductive female hoary bats (*Lasiurus cinereus*). *Journal*  
700 *of Mammalogy* 86:85–94.
- 701 Willis, C. K. R., and R. M. Brigham. 2007. Social thermoregulation exerts more  
702 influence than microclimate on forest roost preferences by a cavity-dwelling  
703 bat. *Behavioral Ecology and Sociobiology* 62:97–108.
- 704 Withers, P. C., C. E. Cooper, S. K. Maloney, F. Bozinovic, and A. P. Cruz-Neto.  
705 2016. *Ecological and environmental physiology of mammals*. First edition.  
706 Oxford University Press, Oxford, U.K.
- 707 Wojciechowski, M. S., M. Jefimow, and E. Tęgowska. 2007. Environmental  
708 conditions, rather than season, determine torpor use and temperature selection  
709 in large mouse-eared bats (*Myotis myotis*). *Comparative Biochemistry and*  
710 *Physiology Part A: Molecular & Integrative Physiology* 147:828–840.

## 711 **Figures**

712 **Fig. 1.** Heuristic diagram outlining the potential energetic benefits for an individual of  
713 using periodic bouts of daily torpor rather than remaining in homeothermy at  
714 temperatures below the thermoneutral zone. Each hypothetical relationship would  
715 result in different patterns of habitat selection for animals seeking to minimize energy  
716 expenditure during periods of inactivity. The black (A) line represents energy  
717 expenditure over a unit of time while maintaining homeothermy 100% of the time.  
718 The red (B), grey (C), and blue (D) lines indicate energy expenditure over the same  
719 unit of time while using some amount of torpor. For all three relationships, torpor  
720 provides energy savings (i.e., the difference between the black and other lines), and  
721 these savings are more pronounced at colder ambient temperatures. (B) For  
722 heterotherms that use at least some torpor, energy expenditure *increases* at colder  
723 ambient temperatures because while some energy is saved from employing torpor,  
724 maintaining homeothermy at colder ambient temperatures is relatively more costly  
725 than at warmer temperatures. A heterotherm exhibiting this relationship would seek  
726 *warm* microhabitats to reduce energy use. (C) For heterotherms that use at least some  
727 torpor, energy expenditure *is stable* across a wide range of ambient temperatures  
728 because the energy saved from employing torpor matches (and thus offsets) the  
729 increase in energy expended to maintain homeothermy at colder temperatures. A  
730 heterotherm exhibiting this relationship would not benefit from seeking either warm  
731 or cool microhabitats. (D) For heterotherms that use at least some torpor, energy  
732 expenditure *decreases* at colder ambient temperatures because relatively more energy  
733 is saved from employing torpor even as maintaining homeothermy at colder ambient  
734 temperatures is relatively more costly than at warmer temperatures. A heterotherm  
735 exhibiting this relationship would seek *cool* microhabitats to reduce energy use.

736

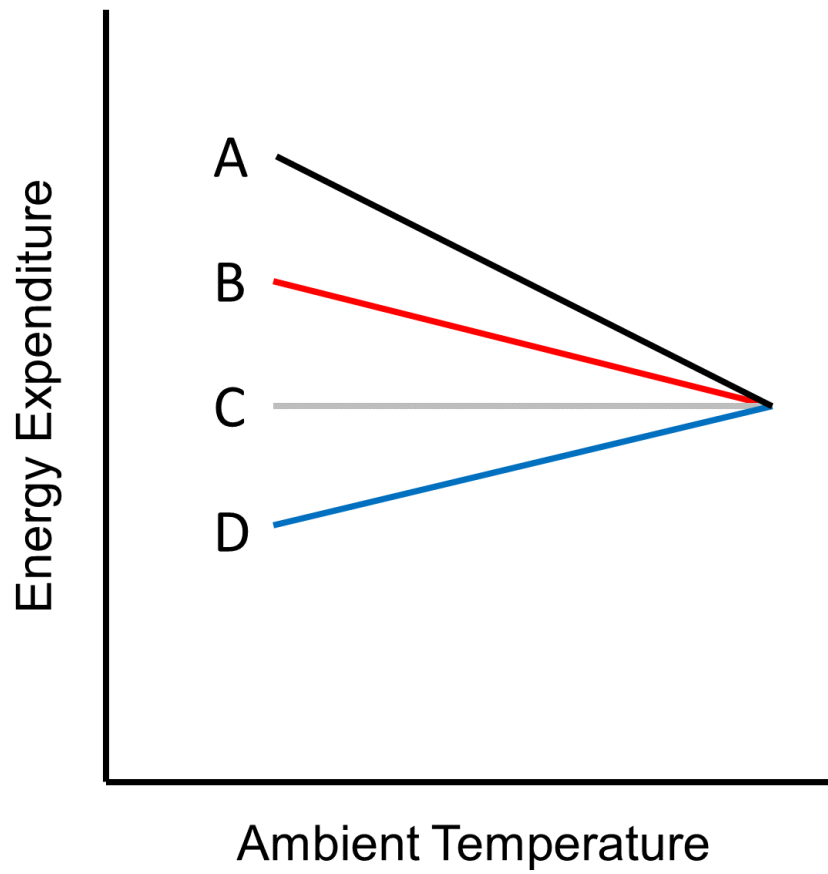

737

738 **Fig. 2.** Four competing sets of predictions of roost selection by a heterothermic bat. Each column represents one of four sets of predictions, and  
739 each row represents a statistical relationship consistent with the predictions. In column 1, energy expenditure over the course of a day is higher  
740 in cool roosts than in warm roosts (1A). In response, bats select warm roosts to minimize energy expenditure during the day (1B). In this  
741 scenario, there should be no directional relationship between ambient temperature and roost temperature (i.e., bats always select warm roosts  
742 regardless of ambient temperature; 1C). In column 2, energy expenditure over the course of a day is higher in warm roosts than in cool roosts  
743 (2A). In response, bats select cool roosts to minimize energy expenditure during the day (2B). In this scenario, there should be no directional  
744 relationship between ambient temperature and roost temperature (i.e., bats always select cool roosts regardless of ambient temperature; 2C). In  
745 column 3, energy expenditure over the course of a day is constant across roosts of all temperatures (because bats can adaptively use torpor so  
746 that roost temperatures over the course of a day have little influence on overall energy expenditure; 3A). Because energy expenditure is  
747 consistent across roosts of all temperatures, bats do not select roosts due to roost temperature (3B). In this scenario, there is no relationship  
748 between ambient temperature and roost temperature (i.e., bats never select roosts due to temperatures within roosts, regardless of ambient  
749 temperature; 3C). In column 4, energy expenditure peaks at intermediate roost temperatures where bats use relatively little torpor but the costs of  
750 maintaining homeothermy are relatively high (4A). In response, bats select cool roosts on cool days and warm roosts on warm days (4B) because  
751 torpor saves more energy in cool roosts than in warm roosts. In this scenario, the relationship between ambient temperature and roost  
752 temperature should be positive (i.e., bats select warmer roosts on warmer days; 4C).



1 | Selection for warm roosts

2 | Selection for cool roosts

3 | No roost selection

4 | Shifting roost selection

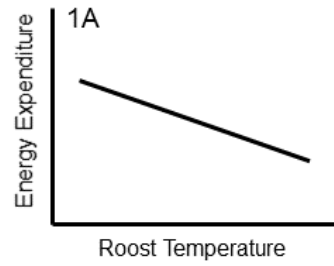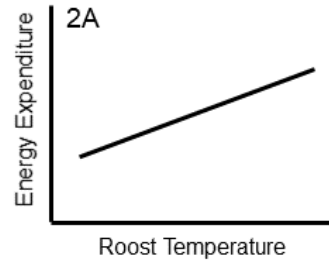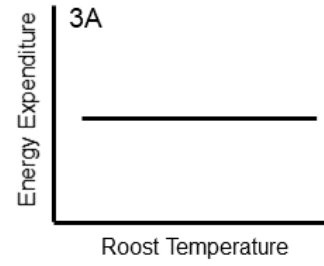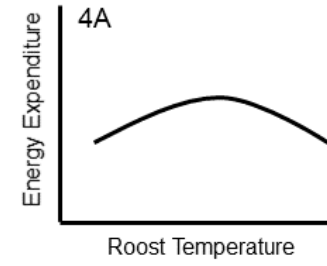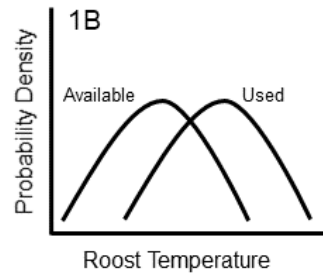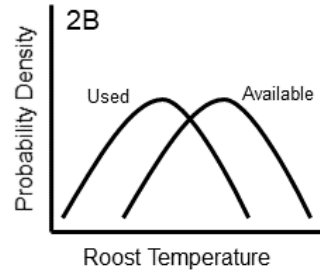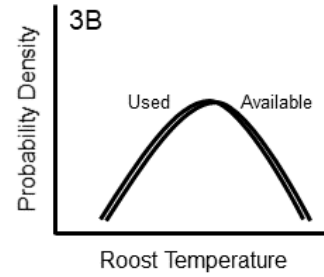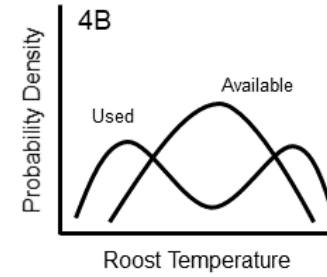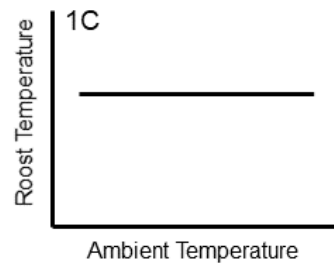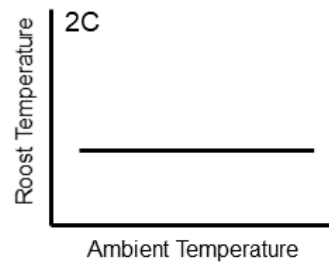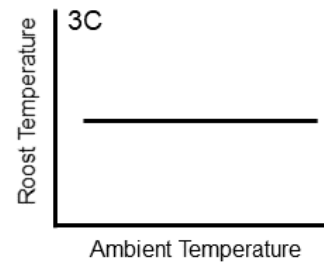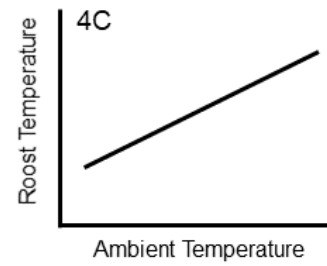

754 **Fig. 3.** Scatter plot illustrating the conditional effect of daily mean ambient  
755 temperature on the total duration of bouts of torpor during the day. Each point is  
756 based on observed data and represents one day. The line represents the regression line  
757 for this relationship and the grey band represents 95% credible intervals around this  
758 line. Credible intervals for this conditional effect did not cross zero (parameter  
759 estimate: -37.4 min; 95% credible intervals: -64.0 – -12.6 min), indicating that bats  
760 spent ca. 37 minutes less in torpor per day for each additional 1°C in daily mean  
761 ambient temperature between 0445 hrs and 2100 hrs.

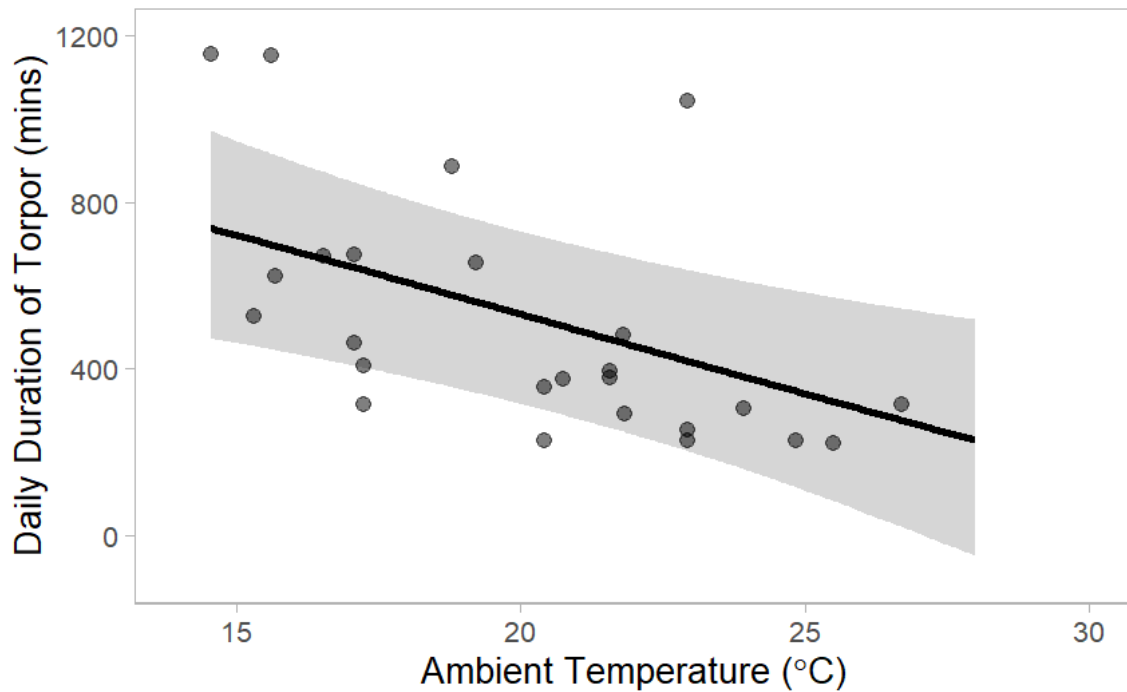

762

763

764 **Fig. 4.** Results of our simulation of daily energy expenditure by fringed myotis over  
765 the range of temperatures observed in used roosts. Each point represents one day. The  
766 red points represent estimated daily energy expenditure if bats never used torpor. The  
767 blue points represent our estimate of energy expenditure over the course of a day if  
768 part of the day is spent in torpor (with the daily duration of torpor a function of daily  
769 ambient temperature as observed during our study). The lines represent loess  
770 regressions of the relationship between roost temperature and daily energy  
771 expenditure. Estimates of daily energy expenditure incorporating observed bat  
772 behaviour are steady across all roost temperatures observed during our study. The  
773 blue points in this figure correspond with Row A in Fig. 2, and are most closely  
774 matched by Fig 2.3A.  
775

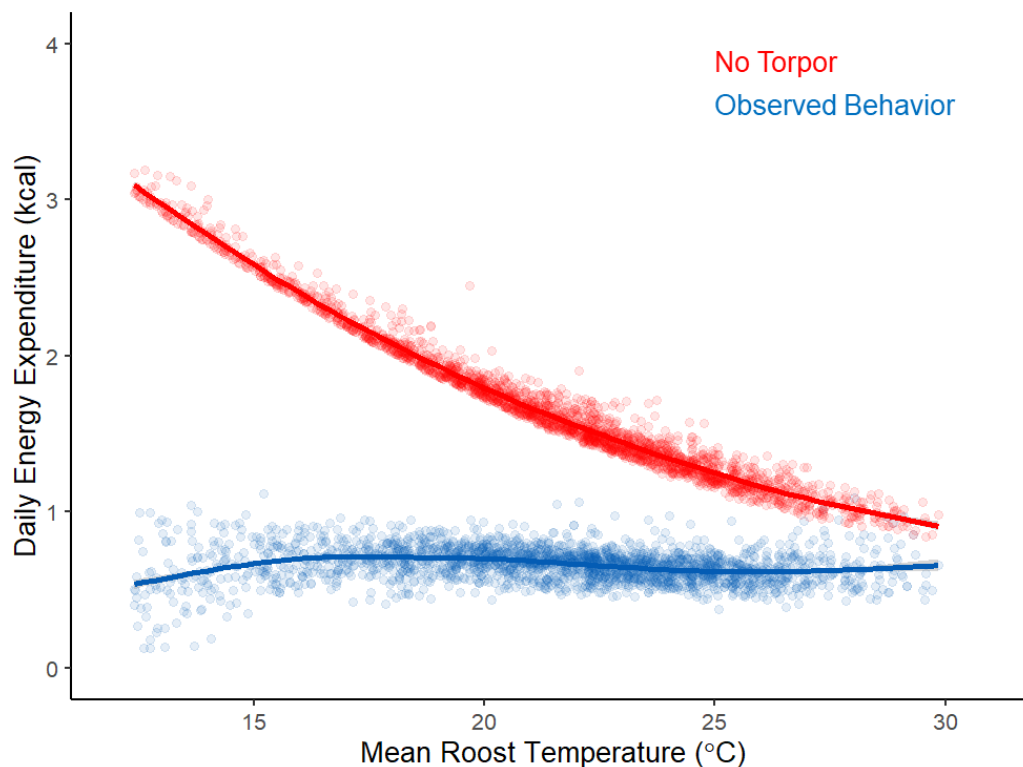

776

777 **Fig. 5.** Kernel density plots comparing thermal characteristics within used and available roost structures: mean temperature (A), time of day at  
778 peak temperature (B), and the standard deviation of temperature (C). Blue distributions represent used roosts, while orange distributions  
779 represent available roosts. These plots illustrate the results of our binomial model of roost selection. Used roosts were slightly warmer on  
780 average than available roosts, but their distributions largely overlapped (A). Temperatures peaked slightly earlier in used roosts than available  
781 roosts, but this was a function of temperatures in warmer roosts tending to peak earlier in the day ( $r = -0.19$  for the relationship between mean  
782 temperature within roost structures and time of day at peak temperature) and their distributions largely overlap (B). The standard deviation in  
783 temperatures within used roosts is very similar to the standard deviation in temperatures within available roosts, although bats did not use the  
784 few roost structures with very high standard deviations (C). Panel A in this figure corresponds with Row B in Fig. 2, and is most closely matched  
785 by Fig. 2.3B.

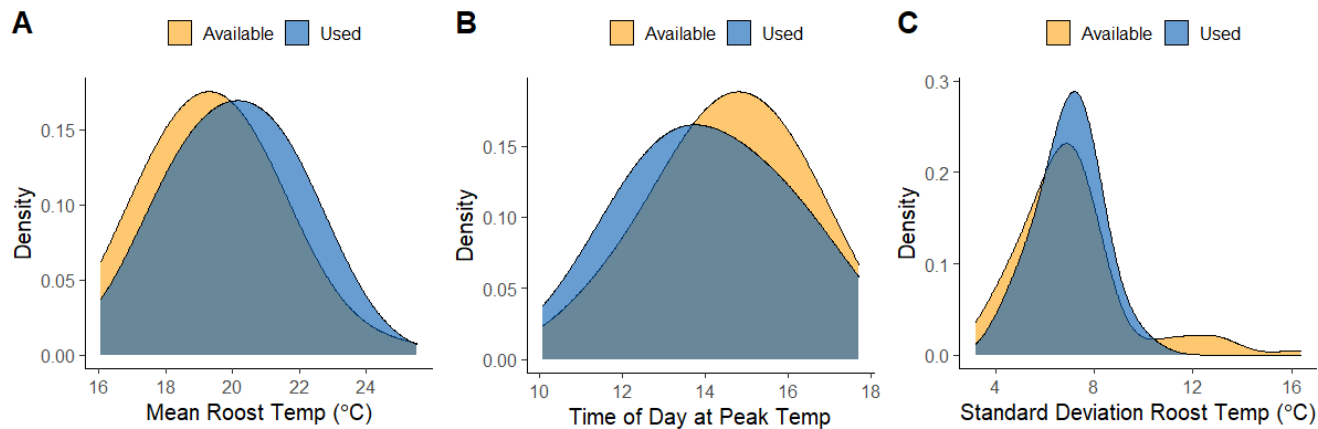

786

787 **Fig. 6.** Scatter plot of the relationship between ambient temperature on a given day  
788 and the mean temperature within used roosts. Each point is based on observed data,  
789 and represents a roost used for one day; some roosts ( $n = 14$ ) were used on multiple  
790 days and thus are represented by multiple data points on this plot. The line represents  
791 the regression line for this relationship and the grey band represents 95% confidence  
792 intervals around this line. Ambient temperature on a given day did not influence  
793 whether bats used warm or cool roosts ( $p = 0.06$ ;  $R^2 = 0.04$ ). This figure corresponds  
794 with Row C in Fig. 2, and is most closely matched by Fig. 2.3C.

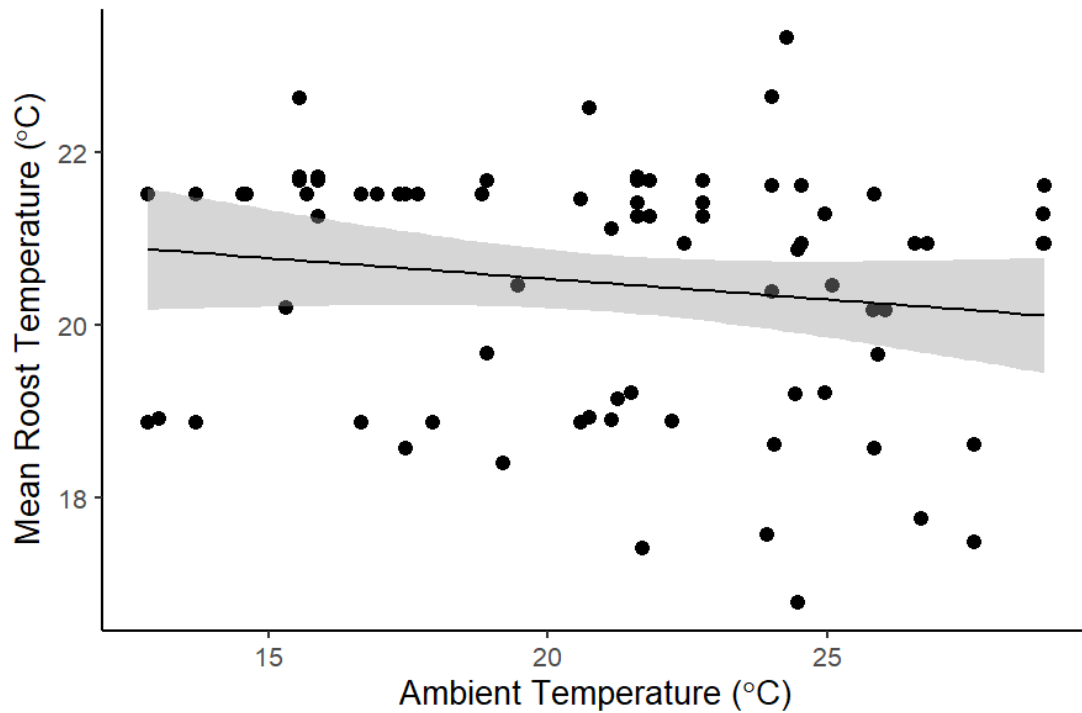

795

## 796 **Appendix A: Supplementary Data**

### 797 **Descriptive Statistics for Rock vs. Tree Roost Structures**

798           Temperatures within used rock crevices averaged 20.5°C (range: 16.8° –  
799 23.3°C) while temperatures within available rock crevices averaged 19.9°C (range:  
800 16.5° – 24.2°C). Temperatures within used tree roosts averaged 18.6°C (range: 17.4° –  
801 20.4°C) while temperatures within available tree cavities averaged 19.2°C (range:  
802 16.1° – 25.5°C) and temperatures within available spaces under sloughing bark  
803 averaged 18.4°C (range: 16.1° – 21.0°C).

804           Temperatures within used rock crevices peaked on average at 1414 hrs (range:  
805 1105 – 1719 hrs), while temperatures within available rock crevices peaked on  
806 average at 1458 hrs (range: 1005 – 1742 hrs). Temperatures within used tree roosts  
807 peaked on average at 1447 hrs (range: 1125 – 1659 hrs), while temperatures within  
808 available tree cavities peaked on average at 1410 hrs (range: 1120 – 1608 hrs) and  
809 temperatures within available spaces under sloughing bark peaked on average at 1349  
810 hrs (range: 1056 – 1608 hrs).

811           The standard deviation of temperatures within used rock crevices was 6.7°C  
812 (range: 4.3° – 10.0°C), while the standard deviation of temperatures within available  
813 rock crevices was 6.2°C (range: 3.2° - 11.0°C). The standard deviation of temperatures  
814 within used tree roosts was 7.7°C (range: 6.7° - 9.1°C), while the standard deviation of  
815 temperatures within available tree cavities was 8.7°C (range: 5.9° - 16.4°C) and within  
816 available spaces under sloughing bark was 7.7°C (range: 6.5° - 11.0°C).

817           There was no difference in ambient temperature between days where rock  
818 crevices were used and days where tree roost structures were used (Mann-Whitney U  
819 = 299;  $p = 0.968$ ).

820 **Table A1.** Information on torpor use by bats tracked during our study, including an ID number for each individual, the dates for which we have  
821 data, the mass of bats at time of capture, the timing of torpor entry and exit for morning and afternoon bouts of torpor, the duration of periods of  
822 periods of torpor in both mornings and afternoons, and the total duration of torpor across the day.

| <b>Bat ID</b> | <b>Date</b> | <b>Mass<br/>(grams)</b> | <b>AM Torpor<br/>Start Time<br/>(hrs)</b> | <b>AM Torpor<br/>End Time<br/>(hrs)</b> | <b>Duration of<br/>AM Torpor<br/>(mins)</b> | <b>PM Torpor<br/>Start Time<br/>(hrs)</b> | <b>PM Torpor<br/>End Time<br/>(hrs)</b> | <b>Duration of<br/>PM Torpor<br/>(mins)</b> | <b>Total Torpor<br/>Duration<br/>(mins)</b> |
|---------------|-------------|-------------------------|-------------------------------------------|-----------------------------------------|---------------------------------------------|-------------------------------------------|-----------------------------------------|---------------------------------------------|---------------------------------------------|
| 172_063       | 8/5/2017    | 6.02                    | 517                                       | 1456                                    | 579                                         | 2013                                      | 2055                                    | 42                                          | 621                                         |
| 172_063       | 8/6/2017    | 6.02                    | 451                                       | 1210                                    | 439                                         | 1910                                      | 2037                                    | 87                                          | 526                                         |
| 172_063       | 8/7/2017    | 6.02                    | 2245                                      | 1557                                    | 1032                                        | 1840                                      | 2044                                    | 124                                         | 1156                                        |
| 172_904       | 6/28/2018   | 6.75                    | 425                                       | 733                                     | 188                                         | 1825                                      | 2057                                    | 125                                         | 313                                         |
| 172_904       | 6/29/2018   | 6.75                    | 419                                       | 1037                                    | 378                                         | 1603                                      | 2114                                    | 277                                         | 655                                         |
| 172_904       | 7/3/2018    | 6.75                    | 525                                       | 944                                     | 259                                         | 1834                                      | 2029                                    | 115                                         | 374                                         |
| 172_904       | 7/4/2018    | 6.75                    | 412                                       | 1446                                    | 634                                         | 1709                                      | 2122                                    | 253                                         | 887                                         |
| 172_904       | 7/5/2018    | 6.75                    | 424                                       | 1458                                    | 597                                         | 1930                                      | 2043                                    | 73                                          | 670                                         |
| 172_904       | 7/6/2018    | 6.75                    | 511                                       | 1016                                    | 305                                         | -                                         | -                                       | 0                                           | 305                                         |
| 172_904       | 7/7/2018    | 6.75                    | 438                                       | 818                                     | 220                                         | -                                         | -                                       | 0                                           | 220                                         |
| 172_692       | 7/13/2018   | 6.92                    | 445                                       | 830                                     | 225                                         | 1936                                      | 2043                                    | 67                                          | 292                                         |
| 172_692       | 7/14/2018   | 6.92                    | 435                                       | 815                                     | 220                                         | -                                         | -                                       | 0                                           | 220                                         |
| 172_632       | 7/20/2018   | 8.04                    | 426                                       | 1102                                    | 396                                         | 1916                                      | 2041                                    | 85                                          | 481                                         |
| 172_753       | 7/27/2018   | 8.16                    | 133                                       | 2045                                    | 1152                                        | -                                         | -                                       | 0                                           | 1152                                        |
| 172_753       | 7/28/2018   | 8.16                    | 2300                                      | 2031                                    | 1291                                        | -                                         | -                                       | 0                                           | 1291                                        |
| 172_453       | 8/4/2018    | 7.1                     | 449                                       | 959                                     | 310                                         | 1915                                      | 2039                                    | 84                                          | 394                                         |
| 172_784       | 8/4/2018    | 7.53                    | 442                                       | 1028                                    | 346                                         | 1951                                      | 2023                                    | 32                                          | 378                                         |
| 172_453       | 8/5/2018    | 7.1                     | 459                                       | 1156                                    | 417                                         | 1613                                      | 2028                                    | 255                                         | 672                                         |

|         |           |      |      |      |     |      |      |     |      |
|---------|-----------|------|------|------|-----|------|------|-----|------|
| 172_784 | 8/5/2018  | 7.53 | 445  | 1100 | 375 | 1852 | 2019 | 87  | 462  |
| 172_453 | 8/6/2018  | 7.1  | 441  | 916  | 275 | 1823 | 2034 | 131 | 406  |
| 172_784 | 8/6/2018  | 7.53 | 449  | 1003 | 314 | -    | -    | 0   | 314  |
| 172_453 | 8/7/2018  | 7.1  | 444  | 1041 | 357 | -    | -    | 0   | 357  |
| 172_784 | 8/7/2018  | 7.53 | 502  | 850  | 228 | -    | -    | 0   | 228  |
| 172_063 | 8/8/2018  | 6.02 | 2335 | 1427 | 892 | 1737 | 2009 | 152 | 1044 |
| 172_453 | 8/8/2018  | 7.1  | 451  | 839  | 228 | -    | -    | 0   | 228  |
| 172_784 | 8/8/2018  | 7.53 | 439  | 852  | 253 | -    | -    | 0   | 253  |
| 172_453 | 8/10/2018 | 7.1  | 456  | 843  | 227 | -    | -    | 0   | 227  |

---

823



824 **Fig. A1.** An example of raw skin temperature data that we used to delineate bouts of torpor. Periods of time in red blocks represent periods of  
825 activity (flying, foraging, etc.), periods of time in blue blocks represent periods of torpor, and periods in white represent periods of homeothermy  
826 or transition between torpor and homeothermy/activity. To delineate bouts of torpor, we used the definition suggested in Barclay, Lausen, &  
827 Hollis (2001).

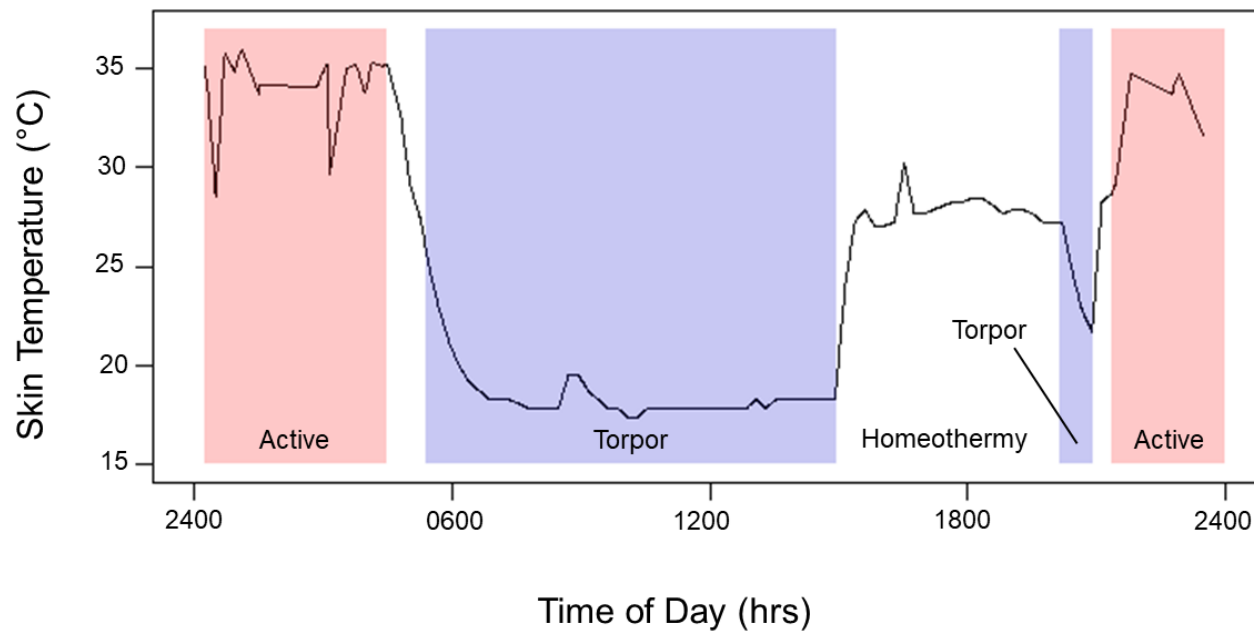

828
